# Supplementary material
Source: publisher figshare collection journal article supplement (https://sage.figshare.com/ndownloader/files/21208131)
Supplement: Supplementary file 1 [file 21208131]

Supplemental Table 1.

*Descriptive Statistics (T-scores) and Reliabilities for MMPI-2-RF Scale Scores*

|                                             | Mean ( <i>M</i> ) | <i>SD</i> | $\alpha$ |
|---------------------------------------------|-------------------|-----------|----------|
| Variable Response Inconsistency (VRIN-r)    | 56.14             | 11.38     |          |
| True Response Inconsistency (TRIN-r)        | 57.58             | 7.40      |          |
| Infrequent Responses (F-r)                  | 71.28             | 23.16     |          |
| Infrequent Psychopathology Responses (Fp-r) | 62.14             | 20.29     |          |
| Infrequent Somatic Responses (Fs)           | 63.14             | 20.01     |          |
| Symptom Validity (FBS-r)                    | 60.61             | 14.51     |          |
| Response Bias (RBS)                         | 64.45             | 17.41     |          |
| Uncommon Virtues (L-r)                      | 57.75             | 10.94     |          |
| Adjustment Validity (K-r)                   | 46.61             | 10.71     |          |
| Emotional/Internalizing Dysfunction (EID)   | 58.30             | 14.76     | .79      |
| Thought Dysfunction (THD)                   | 59.09             | 16.63     | .88      |
| Behavioral/Externalizing Dysfunction (BXD)  | 58.23             | 11.00     | .75      |
| Demoralization (RCd)                        | 59.74             | 13.43     | .93      |
| Somatic Complaints (RC1)                    | 60.78             | 13.19     | .86      |
| Low Positive Emotions (RC2)                 | 57.12             | 15.60     | .84      |
| Cynicism (RC3)                              | 53.93             | 12.30     | .85      |
| Antisocial Behavior (RC4)                   | 62.73             | 11.81     | .78      |
| Ideas of Persecution (RC6)                  | 62.49             | 16.43     | .84      |
| Dysfunctional Negative Emotions (RC7)       | 54.96             | 14.24     | .90      |
| Aberrant Experiences (RC8)                  | 59.02             | 14.71     | .86      |
| Hypomanic Activation (RC9)                  | 50.56             | 10.04     | .80      |
| Malaise (MLS)                               | 60.92             | 13.05     | .74      |
| Gastrointestinal Complaints (GIC)           | 54.71             | 13.28     | .74      |
| Head Pain Complaints (HPC)                  | 56.75             | 12.59     | .76      |
| Neurological Complaints (NUC)               | 61.45             | 14.40     | .72      |
| Cognitive Complaints (COG)                  | 60.75             | 15.51     | .78      |
| Suicidal/Death Ideation (SUI)               | 59.75             | 18.02     | .69      |
| Helplessness/Hopelessness (HLP)             | 52.34             | 14.22     | .73      |
| Self-doubt (SFD)                            | 56.66             | 12.54     | .78      |
| Inefficacy (NFC)                            | 55.50             | 11.80     | .77      |
| Stress/Worry (STW)                          | 55.84             | 11.93     | .65      |
| Anxiety (AXY)                               | 64.51             | 19.56     | .79      |

|                                                         |       |       |     |
|---------------------------------------------------------|-------|-------|-----|
| Anger Proneness (ANP)                                   | 52.36 | 10.93 | .75 |
| Behavior-Restricting Fears (BRF)                        | 55.99 | 14.56 | .72 |
| Multiple Specific Fears (MSF)                           | 48.94 | 9.65  | .76 |
| Juvenile Conduct Problems (JCP)                         | 57.64 | 12.24 | .66 |
| Substance Abuse (SUB)                                   | 69.21 | 12.58 | .67 |
| Aggression (AGG)                                        | 57.64 | 12.24 | .70 |
| Activation (ACT)                                        | 51.38 | 12.24 | .70 |
| Family Problems (FML)                                   | 56.73 | 14.15 | .78 |
| Interpersonal Passivity (IPP)                           | 48.76 | 9.31  | .68 |
| Social Avoidance (SAV)                                  | 56.92 | 13.45 | .86 |
| Shyness (SHY)                                           | 49.71 | 10.32 | .79 |
| Disaffiliativeness (DSF)                                | 57.42 | 14.78 | .65 |
| Aesthetic-Literary Interest (AES)                       | 45.24 | 8.81  | .55 |
| Mechanical-Physical Interest (MEC)                      | 57.81 | 9.99  | .65 |
| Aggressiveness-Revised (AGGR-r)                         | 53.08 | 10.39 | .74 |
| Psychoticism-Revised (PSYC-r)                           | 57.85 | 16.35 | .89 |
| Disconstraint-Revised (DISC-r)                          | 57.47 | 10.12 | .69 |
| Negative Emotionality/Neuroticism-Revised (NEGE-r)      | 55.85 | 12.41 | .82 |
| Introversion/Low Positive Emotionality-Revised (INTR-r) | 56.98 | 12.74 | .84 |

---

*Note.*  $N = 151-159$ .  $T$ -scores ( $M=50$ ,  $SD=10$ ) based on the MMPI-2-RF Normative

comparison group (Ben-Porath & Tellegen, 2008).  $\alpha$  = Internal consistency reliability.

## Supplemental Table 2.

*Correlations between Intake/Treatment Outcome variables and Re-Admission Counts during 12-month Follow-up*

|                                   | Psychiatric | Residential | Substance-related |
|-----------------------------------|-------------|-------------|-------------------|
| <hr/>                             |             |             |                   |
| Intake                            |             |             |                   |
| Homelessness Duration             | -.01        | .02         | .02               |
| Prior Psychiatric Hospitalization | <b>.38*</b> | <b>.14*</b> | <b>.21*</b>       |
| Mental Health Disorder            | <b>.16*</b> | .05         | .09               |
| Substance Use Disorder            | .13         | -.01        | .15               |
| Co-occurring Disorder             | <b>.21*</b> | .02         | <b>.19*</b>       |
| <hr/>                             |             |             |                   |
| Treatment Outcome                 |             |             |                   |
| Rule Violations                   | .07         | <b>.25*</b> | <b>.26*</b>       |
| Negative Exit                     | .08         | <b>.24*</b> | .01               |
| Length of Stay                    | -.13        | -.06        | .00               |
| Successful Outcome                | .00         | -.14        | -.03              |
| <hr/>                             |             |             |                   |

*Note.*  $n = 146$ . Significant findings appear in boldface. All Intake and Treatment Outcome variables except Homelessness Duration and Length of Stay were coded dichotomously.

\*  $p < .05$ .

Supplementary Table 3.

*Relative Risk Ratios (RRR) for Select MMPI-2-RF T-score Elevations for Predicting Dichotomously Coded Hospital Re-Admission Status.*

|                                               | Percentage<br>meeting<br>selection ratio<br>( $\geq 65T$ ) | Risk if<br>Elevated | Risk if Not<br>Elevated | RRR                   | 95% CI               |
|-----------------------------------------------|------------------------------------------------------------|---------------------|-------------------------|-----------------------|----------------------|
| <b>Psychiatric (Base rate = 25%)</b>          |                                                            |                     |                         |                       |                      |
| Suicide/death ideation (SUI)                  | <b>41%</b>                                                 | <b>32.8%</b>        | <b>17.6%</b>            | <b>1.86</b>           | <b>(1.03, 3.32)</b>  |
| Stress/Worry (STW)                            | 27%                                                        | 28.2%               | 22.4%                   | 1.26                  | (.68, 2.32)          |
| <b>Residential (Base rate = 10%)</b>          |                                                            |                     |                         |                       |                      |
| Demoralization (RCd)                          | 30%                                                        | 16.3%               | 6.8%                    | 2.39                  | (.89, 6.2)           |
| Dysfunctional Negative Emotions (RC7)         | <b>23%</b>                                                 | <b>20.6%</b>        | <b>6.3%</b>             | <b>3.29</b>           | <b>(1.24, 8.73)</b>  |
| Head Pain Complaints (HPC)                    | 27%                                                        | 17.5%               | 6.6%                    | 2.65                  | (.99, 7.08)          |
| Cognitive Complaints (COG)                    | <b>30%</b>                                                 | <b>20.5%</b>        | <b>4.9%</b>             | <b>4.17</b>           | <b>(1.48, 11.74)</b> |
| Anxiety (ANX)                                 | 40%                                                        | 19.0%               | 3.4%                    | 5.56                  | (1.62, 19.01)        |
| <b>Substance-Related (Base rate = 15%)</b>    |                                                            |                     |                         |                       |                      |
| Emotional and Internalizing Dysfunction (EID) | 29%                                                        | 9.3%                | 15.5%                   | .93 <sup>1</sup>      | (.82, 1.06)          |
| Demoralization (RCd)                          | 29%                                                        | 7%                  | 16.5%                   | .89                   | (.80, 1.01)          |
| Somatization (RC1)                            | <b>26%</b>                                                 | <b>5.3%</b>         | <b>16.7%</b>            | <b>.88</b>            | <b>(.78, .99)</b>    |
| Cynicism (RC3)                                | <b>19%</b>                                                 | <b>0%</b>           | <b>16.9%</b>            | <b>na<sup>2</sup></b> |                      |
| Malaise (MLS)                                 | 30%                                                        | 6.8%                | 16.7%                   | .89                   | (.79, 1.01)          |
| Head Pain Complaints (HPC)                    | <b>27%</b>                                                 | <b>5%</b>           | <b>17%</b>              | <b>.87</b>            | <b>(.78, .98)</b>    |
| Cognitive Complaints (COG)                    | 30%                                                        | 6.8%                | 16.7%                   | .89                   | (.79, 1.01)          |
| Anger Proneness (ANP)                         | 17%                                                        | 12%                 | 14%                     | .98                   | (.83, 1.15)          |
| Social Avoidance (SAV)                        | <b>32%</b>                                                 | <b>4.3%</b>         | <b>18.2%</b>            | <b>.86</b>            | <b>(.76, .96)</b>    |

|                                                            |     |    |       |     |             |
|------------------------------------------------------------|-----|----|-------|-----|-------------|
| Negative Emotionality/Neuroticism-Revised<br>(NEGE)        | 17% | 8% | 14.9% | .93 | (.81, 1.06) |
| Introversion/Low Positive Emotionality-Revised<br>(INTR-r) | 18% | 9% | 14%   | .95 | (.82, 1.03) |

*Notes.*  $n = 146$ . RRR = Relative Risk Ratio; CI = Confidence interval. Significant findings with confidence intervals not overlapping 1 appear in bold text. MMPI-2-RF scale scores were considered elevated at  $\geq 65T$ . Re-admissions for each category were categorically scored.

- <sup>1.</sup> RRRs less than 1 can be converted using the formula  $1/RRR$  in order to understand the effects in a common frame of reference (see Chen et al., 2010). Using this conversion, the significant (boldface) effects for predicting Substance-Related Readmission ranged from 1.13 to 1.16.
- <sup>2.</sup> A relative risk ratio could not be calculated because one of the cells was zero; specifically, none of the participants with RC3 greater than 65T were re-admitted.
